# Supplementary material for: Distinct trajectories of physical activity and related factors during the life course in the general population: a systematic review
Source: Springer Nature journal article supplement (doi:10.1186/s12889-019-6513-y), 2019-03-06
Supplement: MOESM2 [file 16529906]

Additional file 2: Table S2. Details of the search strategy.

| #   | Searches                                                             |
|-----|----------------------------------------------------------------------|
| 1.  | trajector*                                                           |
| 2.  | physical activit*                                                    |
| 3.  | physical inactivit*                                                  |
| 4.  | sport                                                                |
| 5.  | sports                                                               |
| 6.  | exercise                                                             |
| 7.  | exercises                                                            |
| 8.  | team participation                                                   |
| 9.  | 2 or 3 or 4 or 5 or 6 or 7 or 8                                      |
| 10. | longitudinal                                                         |
| 11. | cohort                                                               |
| 12. | prospective                                                          |
| 13. | panel                                                                |
| 14. | follow-up                                                            |
| 15. | follow up                                                            |
| 16. | 10 or 11 or 12 or 13 or 14 or 15                                     |
| 17. | group                                                                |
| 18. | groups                                                               |
| 19. | cluster                                                              |
| 20. | clusters                                                             |
| 21. | class                                                                |
| 22. | classes                                                              |
| 23. | profile                                                              |
| 24. | profiles                                                             |
| 25. | subgroup                                                             |
| 26. | subgroups                                                            |
| 27. | classification                                                       |
| 28. | classifications                                                      |
| 29. | 17 or 18 or 19 or 20 or 21 or 22 or 23 or 24 or 25 or 26 or 27 or 28 |
| 30. | 1 and 9 and 16 and 29                                                |

‘\*’ indicates truncation.

NB: All search terms were adjusted for the requirements of the different databases. The time was limited from the year 2000 to 13 February 2018, but no other limitations were set concerning the document types or language with the search strategy.
