# Supplementary material for: Distinct trajectories of physical activity and related factors during the life course in the general population: a systematic review
Source: Springer Nature journal article supplement (doi:10.1186/s12889-019-6513-y), 2019-03-06
Supplement: MOESM4 [file 16529906]

**A) From increaser to decreaser / Increaser \*\***

|                       | N                                   | Measure | Method             | Class size (SE) | Class size (95% CI) |
|-----------------------|-------------------------------------|---------|--------------------|-----------------|---------------------|
| <b>Youngest group</b> |                                     |         |                    |                 |                     |
| 1                     | Audrain–McGovern, 2012              | 1,429   | MVPA               | SR              | 0.05 (0.01) •       |
| 2                     | Farooq 2017: Females                | 283     | Total PA volume    | OBM             |                     |
| 3                     | Farooq 2017: Males                  | 262     | Total PA volume    | OBM             |                     |
| 4                     | Farooq 2017: Females                | 283     | MVPA               | OBM             |                     |
| 5                     | Farooq 2017: Males                  | 262     | MVPA               | OBM             |                     |
| 6                     | Findlay, 2009: Females              | 4,497   | Organized PA       | PR + SR         |                     |
| 7                     | Findlay, 2009: Males                | 4,320   | Organized PA       | PR + SR         |                     |
| 8                     | Findlay, 2010: Females              | 4,489   | Unorganized PA     | PR + SR         |                     |
| 9                     | Findlay, 2010: Males                | 4,489   | Unorganized PA     | PR + SR         |                     |
| 10                    | Howie, 2016: Females                | 823     | Organized SP       | PR              |                     |
| 11                    | Howie, 2016: Males                  | 856     | Organized SP       | PR              | 0.08 (0.01) •       |
| 12                    | Janz, 2014: Females                 | 265     | MVPA               | OBM             |                     |
| 13                    | Janz, 2014: Males                   | 265     | MVPA               | OBM             | 0.23 (0.03) →       |
| 14                    | Kwon, 2015a*                        | 537     | MVPA               | OBM             |                     |
| 15                    | Kwon, 2015a*                        | 537     | SP                 | SR              |                     |
| 16                    | Kwon, Lee, Carnethon, 2015: Females | 2,155   | PA                 | SR              |                     |
| 17                    | Rodriguez, 2004                     | 1,098   | Team participation | SR              | 0.07 (0.01) •       |
| <b>Middle group</b>   |                                     |         |                    |                 |                     |
| 18                    | Barnett, 2008                       | 884     | LTPA               | SR              | 0.25 (0.01) •       |
| 19                    | Dishman, 2010                       | 497     | MVPA               | SR              | 0.19 (0.02) →       |
| 20                    | Kaseva, 2016                        | 3,564   | LTPA               | SR              |                     |
| 21                    | Kim, 2016: Females                  | 669     | PA                 | OBM             |                     |
| 22                    | Kiviniemi*, 2016: Females           | 1,776   | LTPA               | SR              |                     |
| 23                    | Kiviniemi*, 2016: Males             | 1,286   | LTPA               | SR              |                     |
| 24                    | Laddu, 2017a                        | 3,175   | LTPA               | SR              |                     |
| 25                    | Rovio, 2017                         | 2,841   | LTPA               | SR              | 0.14 (0.01) •       |
| <b>Oldest group</b>   |                                     |         |                    |                 |                     |
| 26                    | Aggio, 2018: Males                  | 4,952   | PA                 | SR              | 0.24 (0.01) •       |
| 27                    | Artaud, 2016                        | 10,205  | PA                 | SR              | 0.23 (0.00) •       |
| 28                    | Gabriel, 2017: Females              | 1,771   | Sport and exercise | SR              | 0.13 (0.01) •       |
| 29                    | Hsu, 2013: Females                  | 2,256   | Regular exercise   | SR              | 0.19 (0.01) •       |
| 30                    | Hsu, 2013: Males                    | 2,544   | Regular exercise   | SR              | 0.23 (0.01) •       |
| 31                    | Laddu, 2017b: Males                 | 5,964   | PA                 | SR              |                     |
| 32                    | Nguyen, 2013: Females               | 92,629  | PA                 | SR              |                     |
| 33                    | Pan, 2015                           | 4,018   | PA                 | SR              | 0.23 (0.01) •       |
| 34                    | Xue, 2012: Females                  | 433     | PA                 | SR              |                     |

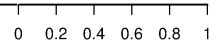

**B) Highly active**

**C) Active**

**D) Inactive**

Class size (SE)

Class size (95% CI)

Class size (SE)

Class size (95% CI)

Class size (SE)

Class size (95% CI)

Youngest

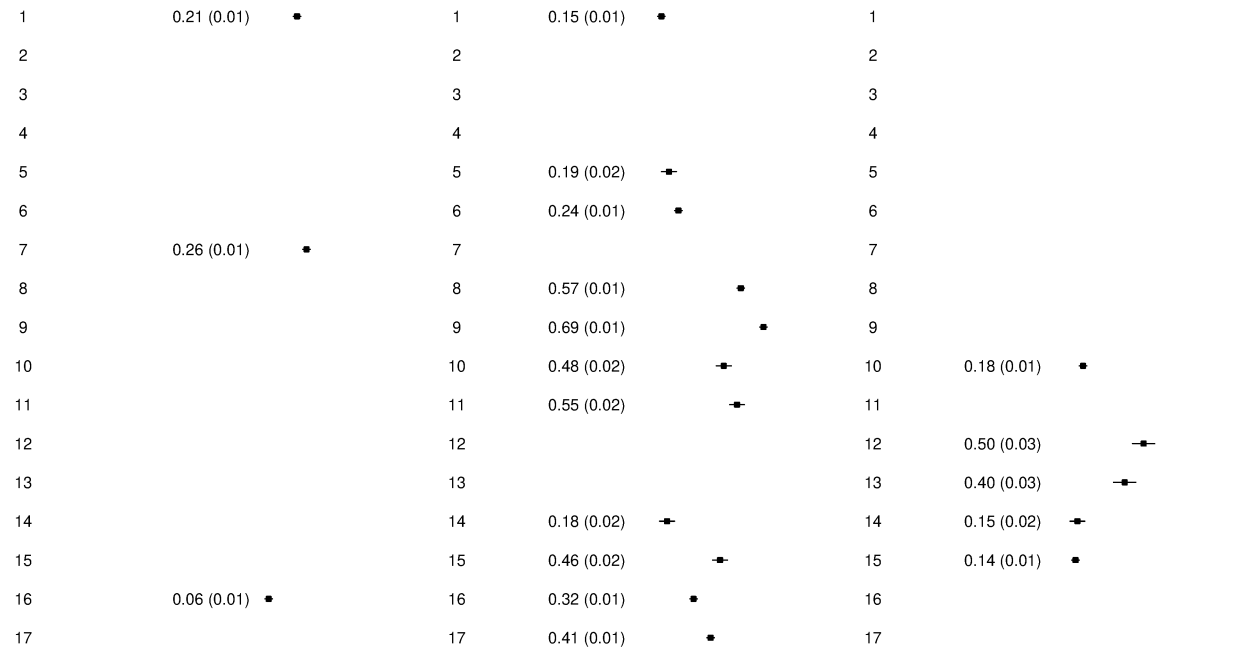

Middle

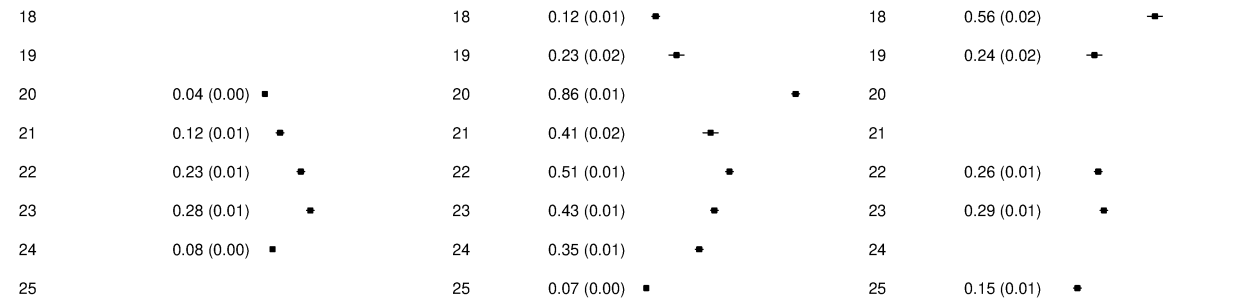

Oldest

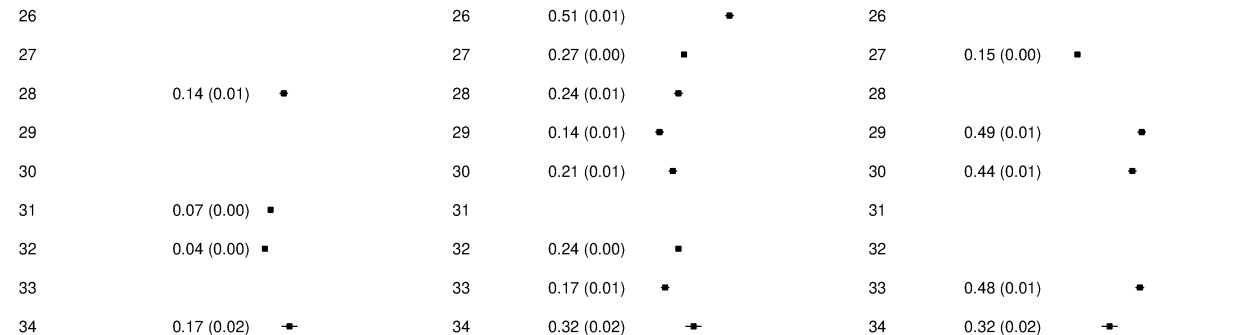

0 0.2 0.4 0.6 0.8 1

0 0.2 0.4 0.6 0.8 1

0 0.2 0.4 0.6 0.8 1

**E) Decreaser of high PA**

**F) Decreaser of moderate PA**

**G) Decreaser of low PA / Low-active**

Class size (SE)

Class size (95% CI)

Class size (SE)

Class size (95% CI)

Class size (SE)

Class size (95% CI)

Youngest

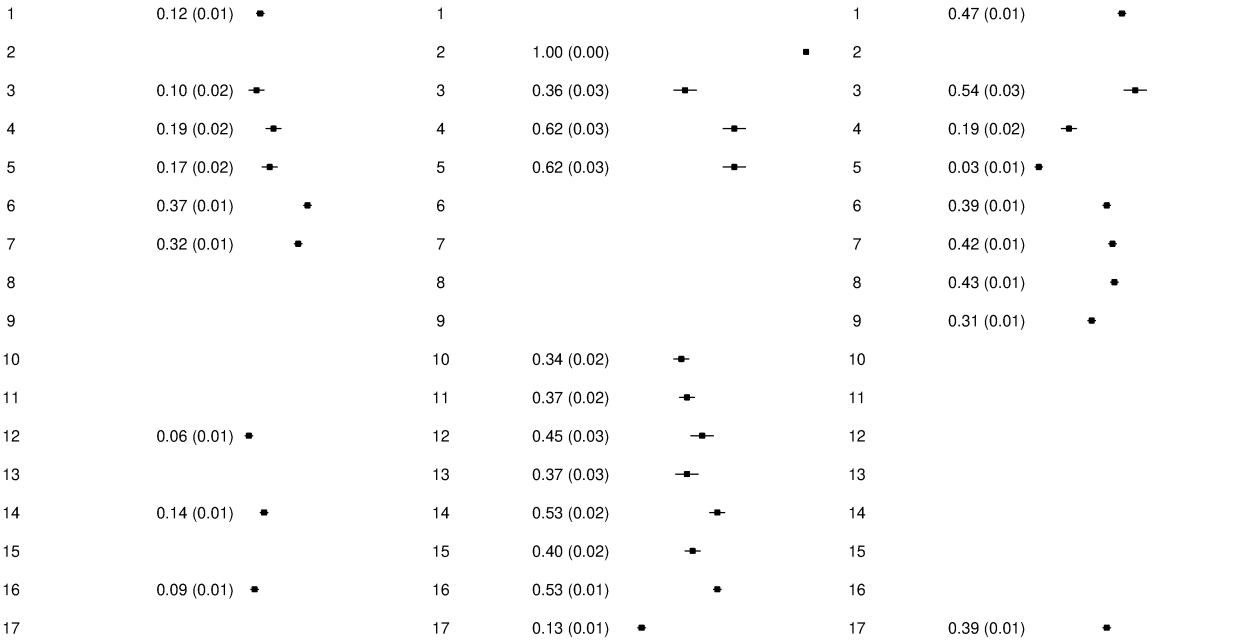

Middle

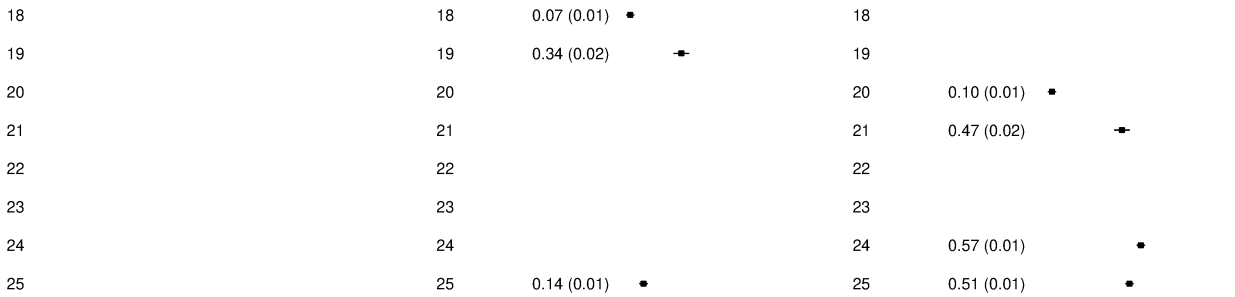

Oldest

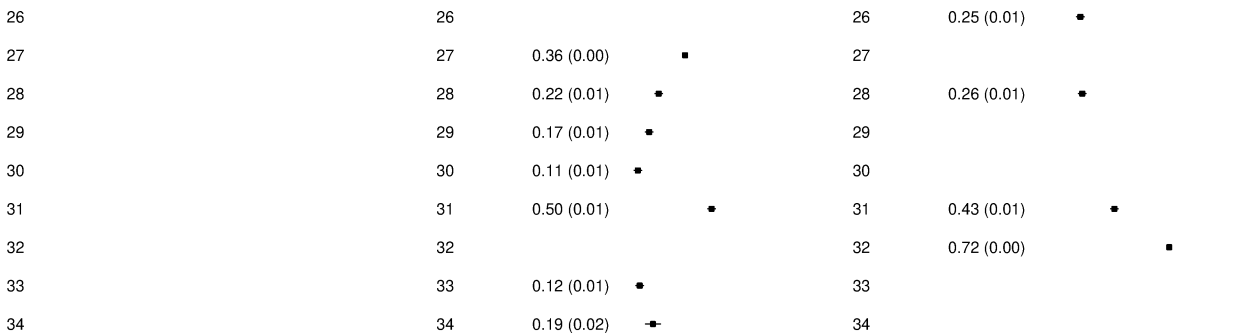

0 0.2 0.4 0.6 0.8 1

0 0.2 0.4 0.6 0.8 1

0 0.2 0.4 0.6 0.8 1

Abbreviations: N = sample size of the study population; SE = standard error; CI = confidence interval; PA = physical activity; MVPA = moderate to vigorous intensity physical activity; LTPA = leisure-time physical activity; SP = sport participation; OBM = objectively measured; SR = self-reported; PR = parent-reported.

\*These exact same trajectories were reported in other study / other studies as well. The duplicates were omitted from the figure.

\*\*The From increaser to decreaser category applies to the youngest group while the Increaser category applies to the middle and the oldest group.
