# Supplementary material for: Distinct trajectories of physical activity and related factors during the life course in the general population: a systematic review
Source: Springer Nature journal article supplement (doi:10.1186/s12889-019-6513-y), 2019-03-06
Supplement: MOESM5 [file 16529906]

Additional file 5: Table S4. Quality assessment checklist and quality scores of the included studies.

| Author<br>(publication year)   | Questions (1-9) modified from the Quality Assessment Tool for<br>Observational Cohort and Cross-Sectional Studies |                                                    |                                                                             |                                                  |                                                                             |                                                                                          |                                                                                                                   |                                                                       |                                                                                                                                              | Questions (11-16) modified from the Guidelines<br>for Reporting on Latent Trajectory Studies |                                                                                                                                                                                         |                                                                                                                |                                                                                                                               |                                                                                     |                                                              |                                                                                          | Sum<br>quality<br>score <sup>b</sup><br>(range<br>0-16) | Quality<br>of the<br>study <sup>c</sup> |      |
|--------------------------------|-------------------------------------------------------------------------------------------------------------------|----------------------------------------------------|-----------------------------------------------------------------------------|--------------------------------------------------|-----------------------------------------------------------------------------|------------------------------------------------------------------------------------------|-------------------------------------------------------------------------------------------------------------------|-----------------------------------------------------------------------|----------------------------------------------------------------------------------------------------------------------------------------------|----------------------------------------------------------------------------------------------|-----------------------------------------------------------------------------------------------------------------------------------------------------------------------------------------|----------------------------------------------------------------------------------------------------------------|-------------------------------------------------------------------------------------------------------------------------------|-------------------------------------------------------------------------------------|--------------------------------------------------------------|------------------------------------------------------------------------------------------|---------------------------------------------------------|-----------------------------------------|------|
|                                | 1. Was the research question or objective in this paper clearly stated?                                           | 2. Was the study population specified and defined? | 3. Was the participation rate of eligible persons at least 50% at baseline? | 4. Was loss to follow-up after baseline defined? | 5. Were inclusion and exclusion criteria for the selected subjects defined? | 6. Were the potential covariates, confounders, determinants and / or predictors defined? | 7. Were the PA <sup>a</sup> measures clearly defined, and implemented consistently across all study participants? | 8. Was the validity and / or reliability of the PA measures reported? | 9. Were the PA measures assessed at least three times (i.e., the minimum number of measurement points needed when identifying trajectories)? | 10. Was PA objectively measured?                                                             | 11. Was more than one statistical fit measure taken under consideration when deciding the final number of trajectory classes and was at least one of the used fit measures BIC or ABIC? | 12. Were the values of the model fit measures (e.g., BIC, ABIC or AIC) concerning the final solution reported? | 13. Were posterior probability values and / or entropy values of the final solution reported or their cut-off values defined? | 14. Was a plot of the final solution with the estimated mean trajectories provided? | 15. Were the total number of fitted models clearly reported? | 16. Were the values of the model fit measures of all the fitted models clearly reported? |                                                         |                                         |      |
| <b>YOUNGEST GROUP:</b>         |                                                                                                                   |                                                    |                                                                             |                                                  |                                                                             |                                                                                          |                                                                                                                   |                                                                       |                                                                                                                                              |                                                                                              |                                                                                                                                                                                         |                                                                                                                |                                                                                                                               |                                                                                     |                                                              |                                                                                          |                                                         |                                         |      |
| Audrain-McGovern et al. (2012) | Yes                                                                                                               | Yes                                                | Yes                                                                         | Yes                                              | Yes                                                                         | Yes                                                                                      | Yes                                                                                                               | Yes                                                                   | Yes                                                                                                                                          | No                                                                                           | Yes                                                                                                                                                                                     | Yes                                                                                                            | Yes                                                                                                                           | Yes                                                                                 | Yes                                                          | Yes                                                                                      | Yes                                                     | 15                                      | good |
| Farooq et al. (2017)           | Yes                                                                                                               | Yes                                                | Yes                                                                         | Yes                                              | Yes                                                                         | NA                                                                                       | Yes                                                                                                               | Yes                                                                   | Yes                                                                                                                                          | Yes                                                                                          | Yes                                                                                                                                                                                     | No                                                                                                             | No                                                                                                                            | Yes                                                                                 | No                                                           | No                                                                                       | No                                                      | 11                                      | fair |
| Findlay, Garner & Cohen (2009) | Yes                                                                                                               | Yes                                                | CA                                                                          | CA                                               | Yes                                                                         | Yes                                                                                      | Yes                                                                                                               | Yes                                                                   | Yes                                                                                                                                          | No                                                                                           | Yes                                                                                                                                                                                     | No                                                                                                             | No                                                                                                                            | Yes                                                                                 | No                                                           | No                                                                                       | No                                                      | 9                                       | fair |

|                                     |     |     |                  |     |     |     |     |     |     |     |     |     |     |     |     |     |    |      |
|-------------------------------------|-----|-----|------------------|-----|-----|-----|-----|-----|-----|-----|-----|-----|-----|-----|-----|-----|----|------|
| Findlay, Garner & Cohen (2010)      | Yes | Yes | Yes              | Yes | Yes | Yes | Yes | Yes | Yes | No  | Yes | No  | Yes | Yes | No  | No  | 12 | good |
| Howie et al. (2016)                 | Yes | Yes | CA               | Yes | Yes | Yes | Yes | Yes | Yes | No  | Yes | Yes | Yes | Yes | Yes | Yes | 14 | good |
| Janz et al. (2014)                  | Yes | Yes | CA               | Yes | Yes | Yes | Yes | Yes | Yes | Yes | Yes | No  | No  | Yes | No  | No  | 11 | fair |
| Kwon, Lee & Carnethon (2015)        | Yes | Yes | Yes              | Yes | Yes | Yes | Yes | Yes | Yes | No  | Yes | Yes | Yes | Yes | Yes | Yes | 15 | good |
| Kwon et al. (2015a)                 | Yes | Yes | CA               | Yes | Yes | Yes | Yes | Yes | Yes | Yes | Yes | Yes | Yes | Yes | Yes | Yes | 15 | good |
| Kwon et al. (2015b)                 | Yes | Yes | CA               | Yes | Yes | Yes | Yes | Yes | Yes | Yes | Yes | Yes | Yes | Yes | Yes | Yes | 15 | good |
| Kwon et al. (2016)                  | Yes | Yes | CA               | Yes | Yes | Yes | Yes | Yes | Yes | Yes | Yes | Yes | Yes | Yes | Yes | Yes | 15 | good |
| Rodriguez & Audrain-McGovern (2004) | Yes | Yes | Yes              | No  | Yes | Yes | Yes | No  | Yes | No  | Yes | Yes | Yes | Yes | Yes | Yes | 13 | good |
| <b>MIDDLE GROUP:</b>                |     |     |                  |     |     |     |     |     |     |     |     |     |     |     |     |     |    |      |
| Barnett et al. (2008)               | Yes | Yes | Yes              | Yes | Yes | Yes | Yes | Yes | Yes | No  | Yes | No  | Yes | Yes | No  | No  | 12 | good |
| Dishman et al. (2010)               | Yes | Yes | Yes              | Yes | Yes | Yes | Yes | Yes | Yes | No  | No  | No  | Yes | Yes | No  | No  | 11 | fair |
| Kaseva et al. (2016)                | Yes | Yes | Yes              | Yes | Yes | Yes | Yes | Yes | Yes | No  | No  | Yes | Yes | Yes | Yes | Yes | 14 | good |
| Kim et al. (2016)                   | Yes | Yes | Yes              | Yes | Yes | Yes | Yes | Yes | Yes | Yes | Yes | Yes | Yes | No  | Yes | Yes | 15 | good |
| Kiviniemi et al. (2016)             | Yes | Yes | Yes              | Yes | Yes | Yes | Yes | No  | Yes | No  | No  | No  | No  | NA  | Yes | No  | 9  | fair |
| Laddu et al. (2017a)                | Yes | Yes | Yes              | Yes | Yes | Yes | Yes | Yes | Yes | No  | Yes | No  | Yes | Yes | No  | No  | 12 | good |
| Oura et al. (2016)                  | Yes | Yes | Yes <sup>d</sup> | Yes | Yes | Yes | Yes | No  | Yes | No  | No  | No  | No  | NA  | Yes | No  | 9  | fair |
| Rovio et al. (2017)                 | Yes | Yes | Yes              | Yes | Yes | Yes | Yes | Yes | Yes | No  | Yes | No  | Yes | Yes | Yes | No  | 13 | good |
| <b>OLDEST GROUP:</b>                |     |     |                  |     |     |     |     |     |     |     |     |     |     |     |     |     |    |      |
| Aggio et al. (2018)                 | Yes | Yes | Yes              | Yes | Yes | Yes | Yes | Yes | Yes | No  | Yes | Yes | Yes | Yes | Yes | Yes | 15 | good |
| Artaud et al. (2016)                | Yes | Yes | Yes              | Yes | Yes | Yes | Yes | No  | Yes | No  | Yes | No  | Yes | Yes | No  | No  | 11 | fair |

|                       |     |     |     |     |     |     |     |     |     |    |     |     |     |     |     |     |    |      |
|-----------------------|-----|-----|-----|-----|-----|-----|-----|-----|-----|----|-----|-----|-----|-----|-----|-----|----|------|
| Gabriel et al. (2017) | Yes | Yes | Yes | Yes | Yes | Yes | Yes | Yes | Yes | No | Yes | No  | No  | Yes | No  | No  | 11 | fair |
| Hsu et al. (2013)     | Yes | Yes | Yes | Yes | Yes | Yes | Yes | No  | Yes | No | No  | Yes | No  | Yes | No  | No  | 10 | fair |
| Laddu et al. (2017b)  | Yes | Yes | Yes | Yes | Yes | NA  | Yes | Yes | Yes | No | Yes | No  | No  | Yes | No  | No  | 10 | fair |
| Nguyen et al. (2013)  | Yes | Yes | Yes | Yes | Yes | Yes | Yes | Yes | Yes | No | Yes | Yes | Yes | Yes | Yes | Yes | 15 | good |
| Pan et al. (2015)     | Yes | Yes | Yes | Yes | Yes | Yes | Yes | No  | Yes | No | Yes | Yes | Yes | Yes | Yes | Yes | 14 | good |
| Xue et al. (2012)     | Yes | Yes | Yes | Yes | Yes | Yes | Yes | Yes | Yes | No | No  | No  | No  | Yes | No  | No  | 10 | fair |

*PA* physical activity; *BIC* Bayesian information criterion; *ABIC* adjusted Bayesian information criterion; *NA* not applicable; *CA* can't answer

<sup>a</sup>PA includes also sport participation and exercise variables.

<sup>b</sup>1 when the criterion was applicable to the analyzed study (1 = yes); 0 when the criterion was not fulfilled, not applicable, or could not be answered based on the information provided by the study (0 = no).

<sup>c</sup>Poor (score ranging from 0 to 5); fair (score ranging from 6 to 11); good (score ranging from 12 to 16).

<sup>d</sup>the participation rate was less than 50% from the original sample but it was 77% of those who had undergone lumbar magnetic resonance imaging.
